# Supplementary material for: The utilization of aerosol therapy in mechanical ventilation patients: a prospective multicenter observational cohort study and a review of the current evidence
Source: PubMed Central journal article supplement — Ann Transl Med. 2020 Sep;8(17):1071. doi: 10.21037/atm-20-1313 (PMC7575997; doi:10.21037/atm-20-1313), 2020-09
Supplement: atm-08-17-1071-dss.pdf [file atm-08-17-1071-dss.pdf]

## Data Sharing Statement

|                     |                                                                                                                                                    |                                                                                                                                                                                          |
|---------------------|----------------------------------------------------------------------------------------------------------------------------------------------------|------------------------------------------------------------------------------------------------------------------------------------------------------------------------------------------|
| <b>Article Info</b> | http://dx.doi.org/10.21037/atm-20-1313                                                                                                             |                                                                                                                                                                                          |
| <b>Item</b>         | <b>Question</b>                                                                                                                                    | <b>Authors' Response<br/>(place "-" if not applicable)</b>                                                                                                                               |
| 1                   | Would you like to share data collected for your study to others?                                                                                   | Yes.                                                                                                                                                                                     |
| 2                   | If not, would you like to share the reason for your decision?                                                                                      | -                                                                                                                                                                                        |
| 3                   | What data in particular will be shared?                                                                                                            | Individual participant data that underline the results reported in this article, after deidentification                                                                                  |
| 4                   | Any other documents will be share? Such as study protocol, statistical analysis plan, informed consent form, clinical study report, analytic code. | Informed consent form                                                                                                                                                                    |
| 5                   | When will data availability begin?                                                                                                                 | 6 months following article publication                                                                                                                                                   |
| 6                   | When will data availability end?                                                                                                                   | 24 months following article publication                                                                                                                                                  |
| 7                   | To whom will you share the data?                                                                                                                   | Researchers who provide a methodologically sound proposal                                                                                                                                |
| 8                   | For what type of analysis or purpose?                                                                                                              | To achieve aims in the approved proposal                                                                                                                                                 |
| 9                   | How or where can the data/documents be obtained?                                                                                                   | Proposal should be directed to shanshan0530@126.com. To gain access, data requestors will need to sign a data access agreement. Data are available for 2 years at a third-party website. |
| 10                  | Any other restrictions?                                                                                                                            | No                                                                                                                                                                                       |
